# Supplementary material for: Process optimization, antioxidant, antibacterial, and drug adjuvant properties of bioactive keratin microparticles derived from porcupine (Hystrix indica) quills
Source: PeerJ. 2023 Aug 18;11:e15653. doi: 10.7717/peerj.15653 (PMC10441523; doi:10.7717/peerj.15653)
Supplement: Supplemental Information 2 [file peerj-11-15653-s002.xlsx]

## Sheet: Yield and paricle size
			Yield %				Particle size
Mercaptoethanol (%)			Avg	SD			Avg	SD
1	32	30	31	1.41421	55	50	52.5	3.53553
1.5	33	36	34.5	2.12132	60	58	59	1.41421
2	37	41	39	2.82843	75	73	74	1.41421
2.5	36	37	36.5	0.707107	80	72	76	5.65685
3	42	40	41	1.41421	92	85	88.5	4.94975
			Yield %				Particle size
Urea			Avg	SD			Avg	SD
5	31	33	32	1.41421	75	80	77.5	3.53553
6.5	31	35	33	2.82843	90	95	92.5	3.53553
7	42	39	40.5	2.12132	87	90	88.5	2.12132
8.5	40	41	40.5	0.707107	93	100	96.5	4.94975
9	42	44	43	1.41421	82	80	81	1.41421
			Yield %				Particle size
Reaction time			Avg	SD			Avg	SD
6	21	27	24	4.24264	81	85	83	2.82843
12	33	31	32	1.41421	98	110	104	8.48528
18	35	31	33	2.82843	117	114	115.5	2.12132
24	34	39	36.5	3.53553	85	90	87.5	3.53553
			Yield %				Particle size
Temperature			Avg	SD			Avg	SD
80	31	29	30	1.41421	70	68	69	1.41421
90	35	36	35.5	0.707107	92	105	98.5	9.19239
100	37	34	35.5	2.12132	101	96	98.5	3.53553
110	40	36	38	2.82843	98	109	103.5	7.77817
120	38	41	39.5	2.12132	90	100	95	7.07107
